# Supplementary material
Source: PubMed Central journal article supplement (PMC2575306)
Supplement: 0802149105_0802149105SI.pdf [file 0802149105_0802149105SI.pdf]

# Supporting Information

Yuan and Bauer 10.1073/pnas.0802149105

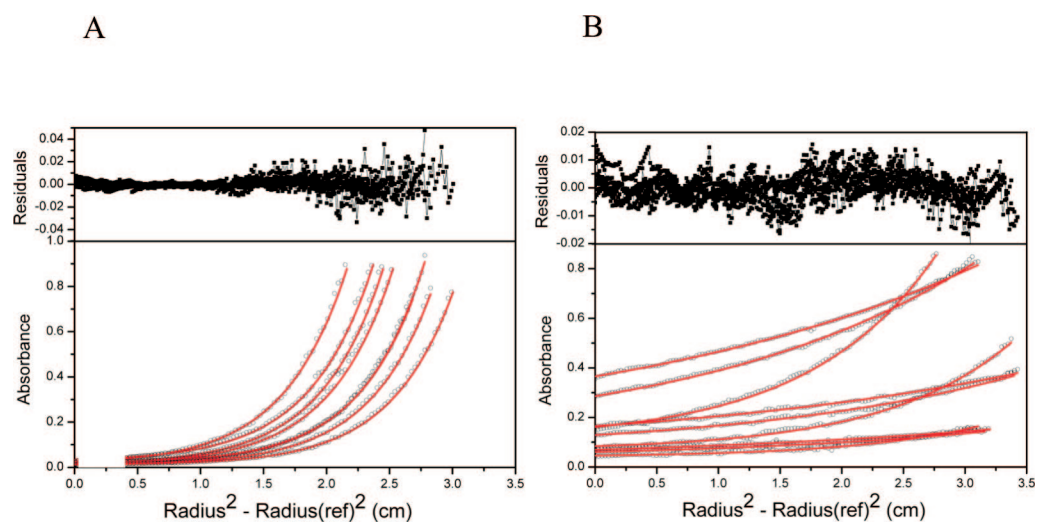

**Fig. S1.** Results from sedimentation equilibrium analysis of PixD alone (A) and the PixD-PixE samples (B). Absorbance values from independent experiments are indicated as open circles with the lines representing fitted data based on a single ideal macromolecular component model. Residuals of the fits are plotted at the top.
